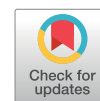

# Altitudes and Hemoglobin A<sub>1c</sub> Values: An Analysis Based on Two Nationwide Cross-sectional Studies

Diabetes Care 2024;47:e11–e13 | <https://doi.org/10.2337/dc23-1549>

Ruizhi Zheng,<sup>1,2</sup> Yu Xu,<sup>1,2</sup> Mian Li,<sup>1,2</sup>  
Long Wang,<sup>1,2</sup> Jieli Lu,<sup>1,2</sup>  
Tiange Wang,<sup>1,2</sup> Min Xu,<sup>1,2</sup>  
Zhiyun Zhao,<sup>1,2</sup> Jie Zheng,<sup>1,2</sup>  
Meng Dai,<sup>1,2</sup> Di Zhang,<sup>1,2</sup>  
Yuhong Chen,<sup>1,2</sup>  
Shuangyuan Wang,<sup>1,2</sup> Hong Lin,<sup>1,2</sup>  
Weiqing Wang,<sup>1,2</sup> Guang Ning,<sup>1,2</sup> and  
Yufang Bi<sup>1,2</sup>

People living at high altitudes require an increase in the number of erythrocytes, known as polycythemia, to compensate for decreased oxygen availability (1). Using HbA<sub>1c</sub> to detect prediabetes or diabetes at high altitudes might lead to misdiagnosis due to a pseudo-increase in HbA<sub>1c</sub> levels in people with polycythemia. In the current study, we aimed to present the effect of high altitudes on diagnosing prediabetes and diabetes using HbA<sub>1c</sub>.

The 2010 China Noncommunicable Disease Surveillance study is a nationwide survey that used a complex, multistage, cluster sampling method to recruit participants from 162 study sites across mainland China (2). In total, 95,052 adults aged ≥18 years who were not taking antidiabetes medications were included in the analysis. The prevalences of prediabetes and diabetes at different altitudes were compared using  $\chi^2$  test that considered weights and study design. The diagnostic accuracy of HbA<sub>1c</sub> for prediabetes and diabetes, defined by fasting plasma glucose (FPG) and 2-h postload glucose (2-h PG), was calculated separately in participants living below and above 2,500 m of sea level. The optimal cutoff was determined by selecting the point maximizing the Youden index. The areas under the curves (AUCs) were compared to assess

the discriminatory ability of HbA<sub>1c</sub> by altitude status. To assess the detection bias of HbA<sub>1c</sub> caused by high altitudes, a subgroup of participants living at low to high altitudes was selected and matched for age, sex, BMI, FPG, and 2-h PG levels. A total of 2,165 participants living at an altitude above 3,750 m were 1:1:1 matched with the participants living below 1,250 m, between 1,250 and 2,499 m, and between 2,500 and 3,749 m. Nearest-neighbor matching was used with the caliper set at 0.05. All analyses were performed using R version 4.2.3. A two-sided *P* value of <0.05 was considered statistically significant.

There were 88,577 participants living below 2,500 m and 6,475 above 2,500 m. In almost all the categories of FPG (per 5-mg/dL increase) and 2-h PG (per 10-mg/dL increase) levels, mean HbA<sub>1c</sub> values were significantly higher in those living above 2,500 m than in those living below 2,500 m. The prevalence of prediabetes and diabetes was significantly higher in the participants living below 2,500 m than in those living above 2,500 m when defined using FPG (32.4% vs. 16.9% for prediabetes; 4.9% vs. 2.2% for diabetes) (Fig. 1A) or 2-h PG (10.7% vs. 5.8% for prediabetes; 3.7% vs. 1.4% for diabetes) (Fig. 1B). In contrast, the prevalence of

prediabetes and diabetes was not statistically different among participants living below 2,500 m and above 2,500 m when defined using HbA<sub>1c</sub> (38.8% vs. 38.4% for prediabetes; 5.0% vs. 3.6% for diabetes) (Fig. 1C).

The discriminative ability of HbA<sub>1c</sub> to identify prediabetes and diabetes defined by FPG and 2-h PG was significantly higher among participants living below 2,500 m versus those living above 2,500 m (AUC difference 3.6%, *P* < 0.001 for prediabetes; AUC difference 3.9%, *P* = 0.048 for diabetes) (Fig. 1D–G). The optimal HbA<sub>1c</sub> cutoffs to detect prediabetes and diabetes were consistently higher among participants living above 2,500 m than those living below 2,500 m. By using the new data set of matched participants, the associations between altitudes and HbA<sub>1c</sub> were flattened below 2,500 m and monotonically increased above 2,500 m (Fig. 1H). We repeated the analyses in another nationwide study population of 48,704 migrant workers aged 18–59 years (3) and obtained similar results (data not shown).

This is the largest study that assessed the impact of altitude on HbA<sub>1c</sub> measurements. In line with a previous study (4), we considered that HbA<sub>1c</sub> measurements were inaccurate for people living at high altitudes. A proper adjustment

<sup>1</sup>Department of Endocrine and Metabolic Diseases, Shanghai Institute of Endocrine and Metabolic Diseases, Ruijin Hospital, Shanghai Jiaotong University School of Medicine, Shanghai, China

<sup>2</sup>National Clinical Research Center for Metabolic Diseases (Shanghai), Key Laboratory for Endocrine and Metabolic Diseases of the National Health Commission of the PR China, National Research Center for Translational Medicine, Shanghai Key Laboratory for Endocrine Tumor, State Key Laboratory of Medical Genomics, Ruijin Hospital, Shanghai Jiaotong University School of Medicine, Shanghai, China

Corresponding author: Yufang Bi, byf10784@rjh.com.cn

Received 18 August 2023 and accepted 16 November 2023

R.Z., Y.X., M.L., and L.W. contributed equally to this work.

© 2024 by the American Diabetes Association. Readers may use this article as long as the work is properly cited, the use is educational and not for profit, and the work is not altered. More information is available at <https://www.diabetesjournals.org/journals/pages/license>.

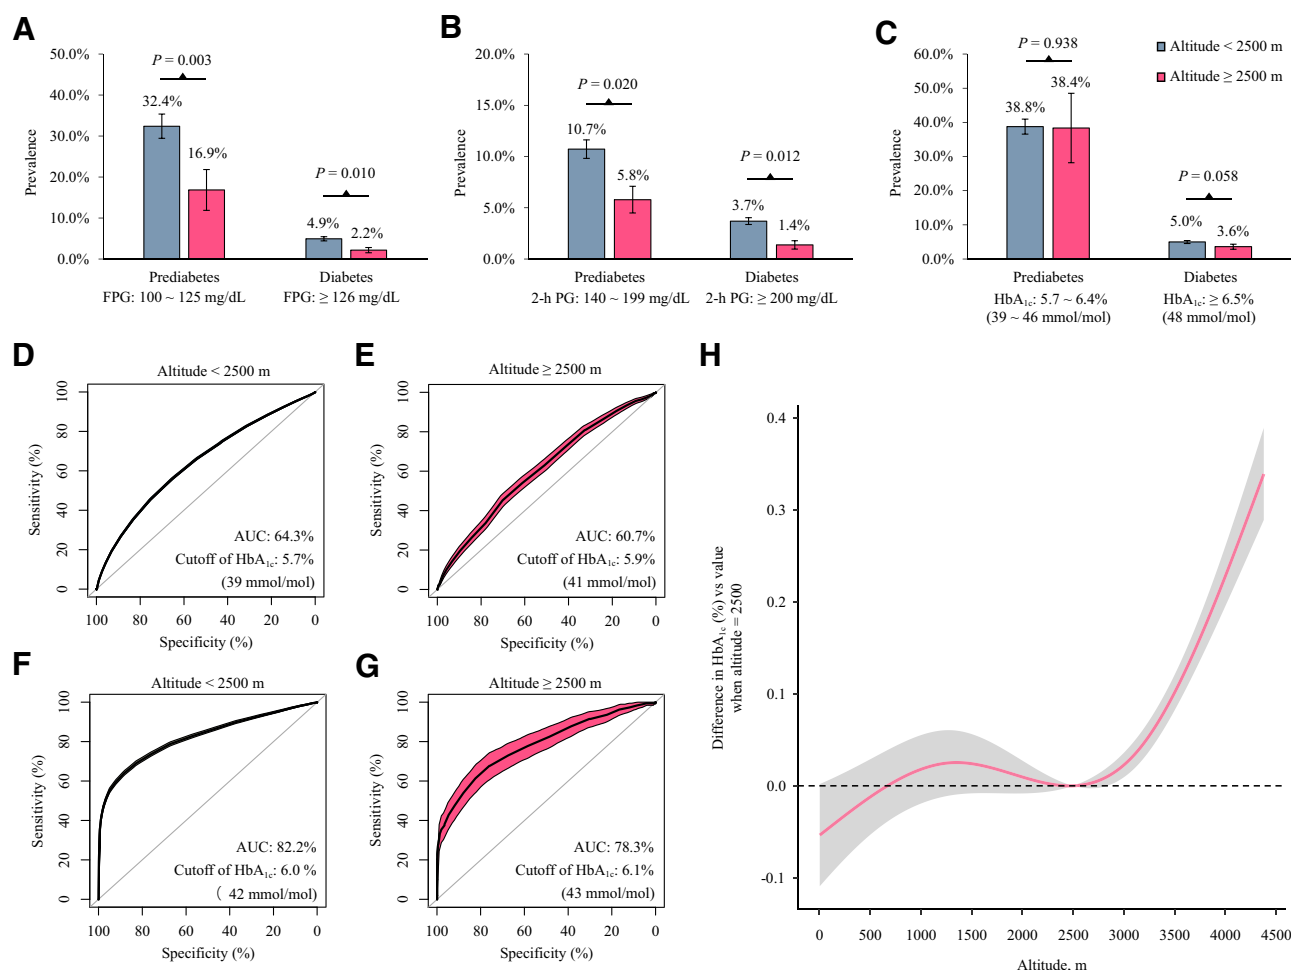

**Figure 1**—Effects of altitude on HbA<sub>1c</sub> using data from the 2010 China Noncommunicable Disease Surveillance study. A–C: Prevalence of prediabetes and diabetes defined by FPG (A), 2-h PG (B), and HbA<sub>1c</sub> (C). D–G: Comparison of the diagnostic ability of HbA<sub>1c</sub> to identify prediabetes (D and E), defined as FPG 100–125 mg/dL or 2-h PG 140–199 mg/dL, and diabetes (F and G) defined as FPG 126 mg/dL or higher or 2-h PG 200 mg/dL or higher by altitude status (D and F, altitude <2,500 m; E and G, altitude ≥2,500 m). H: The new data set of matched participants was used. Possible nonlinear relationships between altitude levels and HbA<sub>1c</sub> were constructed through linear regression by fitting altitude as a smooth term using a restricted cubic spline with four knots (knots located at the 0.05, 0.35, 0.65, and 0.95 percentiles of altitude levels). The reference altitude level was 2,500 m. The model was adjusted for age, sex, education, smoking status, drinking status, physical activity, household income, urban/rural habitation, regional gross domestic product per capita, BMI, FPG, and 2-h PG.

might have to be considered when using HbA<sub>1c</sub> to diagnose diabetes at an altitude above 2,500 m. Our findings were not only obtained from the long-term dwellers but also applied to people who migrated to their current residence at least 6 months previously (2,3). However, we did not measure hemoglobin concentrations or red blood cell counts, which limits further interpretation. Long-term living in hypoxic environments at high altitudes not only causes an increase in erythrocyte formation but also might affect erythrocyte volume and inhibit eryptosis of mature erythrocytes (5). A longer life span of erythrocytes may prolong the time of hemoglobin exposure to blood glucose and lead to the rise of HbA<sub>1c</sub> concentrations.

Overall, HbA<sub>1c</sub> may be systematically overestimated for people living above 2,500 m. Therefore, a proper adjustment might have to be considered when using HbA<sub>1c</sub> to diagnose diabetes at an altitude above 2,500 m. Further studies are needed to correct the detection bias of HbA<sub>1c</sub> caused by high altitudes.

**Funding.** This work was supported by grants from the National Natural Science Foundation of China (82088102 and 81970728), the Shanghai Municipal Government (22Y31900300), the Shanghai Clinical Research Center for Metabolic Diseases (19MC1910100), the Innovative Research Team of High-Level Local Universities in Shanghai, and the Special Project for Clinical Research in Health Industry of Shanghai Municipal Health Commission (202340084). Y.X. is supported by the National Top Young Talents

program. The funding agencies had no role in the design and conduct of the study, in the collection, management, analysis, and interpretation of the data, or in the preparation, review, or approval of the manuscript.

**Duality of Interest.** No potential conflicts of interest relevant to this article were reported.

**Author Contributions.** R.Z., Y.X., and M.L. conceived and designed the study. Y.X., M.L., L.W., J.L., T.W., M.X., M.D., D.Z., Y.C., W.W., G.N., and Y.B. contributed to data acquisition. R.Z., Y.X., M.L., and L.W. analyzed and interpreted the data. R.Z. and Y.X. drafted the manuscript. M.L., L.W., J.L., T.W., M.X., Z.Z., J.Z., Y.C., S.W., H.L., W.W., G.N., and Y.B. revised the manuscript for important intellectual content. All authors agreed to be held accountable for all aspects of this work and approved the final version of the manuscript. R.Z., Y.X., and Y.B. had final responsibility for the decision to submit for publication. R.Z. and Y.X. are the guarantors of this work and, as such, had full access to all the data in the study

and take responsibility for the integrity of the data and the accuracy of the data analysis.

## References

1. Crapo RO, Jensen RL, Hegewald M, Tashkin DP. Arterial blood gas reference values for sea level and an altitude of 1,400 meters. *Am J Respir Crit Care Med* 1999;160:1525–1531
2. Xu Y, Wang L, He J, et al.; 2010 China Noncommunicable Disease Surveillance Group. Prevalence and control of diabetes in Chinese adults. *JAMA* 2013;310:948–959
3. Bi Y, Wang L, Xu Y, et al.; 2012 China Noncommunicable Disease and Risk Factor Surveillance in Migrant Workers Study Group. Diabetes-related metabolic risk factors in internal migrant workers in China: a national surveillance study. *Lancet Diabetes Endocrinol* 2016;4:125–135
4. Ren Q, Lv X, Yang L, et al. Erythrocytosis and performance of HbA1c in detecting diabetes on an oxygen-deficient plateau: a population-based study. *J Clin Endocrinol Metab* 2020;105:dga001
5. Tang F, Feng L, Li R, et al. Inhibition of suicidal erythrocyte death by chronic hypoxia. *High Alt Med Biol* 2019;20:112–119
